# Supplementary material for: Natural Variation in Physicochemical Profiles and Bacterial Communities Associated with Aedes aegypti Breeding Sites and Larvae on Guadeloupe and French Guiana
Source: PubMed Central journal article supplement (PMC7794107; doi:10.1007/s00248-020-01544-3), 2020-07-03
Supplement: 248_2020_1544_MOESM2_ESM.pdf [file 248_2020_1544_MOESM2_ESM.pdf]

| Breeding site    | Sample | Locality      | Equitability  | Simpson | Shannon | Chao1 | Richness |       |
|------------------|--------|---------------|---------------|---------|---------|-------|----------|-------|
| Drums            | Water  | Guadeloupe    | 0.5           | 0.2     | 2.5     | 260.9 | 253.9    |       |
| Gutters          |        |               | 0.6           | 0.3     | 2.4     | 366.9 | 363.8    |       |
| Cisterns         |        |               | 0.5           | 0.1     | 3.5     | 280.2 | 274.3    |       |
| Tyres            |        |               | 0.5           | 0.2     | 2.9     | 263.5 | 259.3    |       |
| Small waste      |        |               | 0.4           | 0.3     | 2.3     | 249.7 | 248.0    |       |
| Buckets          |        |               | 0.5           | 0.2     | 2.6     | 258.4 | 254.6    |       |
| Large waste      |        |               | 0.5           | 0.2     | 2.7     | 240.2 | 236.5    |       |
| Plant containers |        | 0.6           | 0.1           | 3.5     | 380.2   | 374.3 |          |       |
| Drums            |        | French Guiana | French Guiana | 0.5     | 0.2     | 2.6   | 210.1    | 207.8 |
| Tyres            |        |               |               | 0.7     | 0.1     | 3.7   | 285.2    | 283.8 |
| Buckets          | 0.5    |               |               | 0.2     | 2.7     | 240.2 | 236.5    |       |
| Large waste      | 0.5    |               |               | 0.2     | 2.5     | 260.9 | 253.9    |       |
| Water trough     | 0.5    |               |               | 0.2     | 2.9     | 263.5 | 259.3    |       |
| Boat             | 0.5    |               |               | 0.2     | 2.6     | 210.1 | 207.8    |       |
| Large waste      | Larvae | Guadeloupe    | 0.4           | 0.3     | 2.4     | 206.0 | 203.3    |       |
| Drums            |        |               | 0.5           | 0.2     | 2.4     | 185.4 | 180.9    |       |
| Tyres            |        |               | 0.5           | 0.2     | 2.5     | 213.3 | 204.7    |       |
| Small waste      |        |               | 0.5           | 0.2     | 2.5     | 223.3 | 220.1    |       |
| Large waste      |        | French Guiana | French Guiana | 0.5     | 0.2     | 2.5   | 195.8    | 199.5 |
| Drums            |        |               |               | 0.6     | 0.3     | 2.4   | 166.9    | 163.8 |
| Tyres            |        |               |               | 0.5     | 0.3     | 2.4   | 166.9    | 163.6 |
| Buckets          |        |               |               | 0.5     | 0.2     | 2.4   | 153.8    | 151.7 |
| Water trough     |        |               |               | 0.4     | 0.3     | 2.3   | 249.7    | 248.0 |
| Boat             |        |               |               | 0.5     | 0.2     | 2.6   | 167.0    | 167.0 |
