# Supplementary material for: Natural Variation in Physicochemical Profiles and Bacterial Communities Associated with Aedes aegypti Breeding Sites and Larvae on Guadeloupe and French Guiana
Source: PubMed Central journal article supplement (PMC7794107; doi:10.1007/s00248-020-01544-3), 2020-07-03

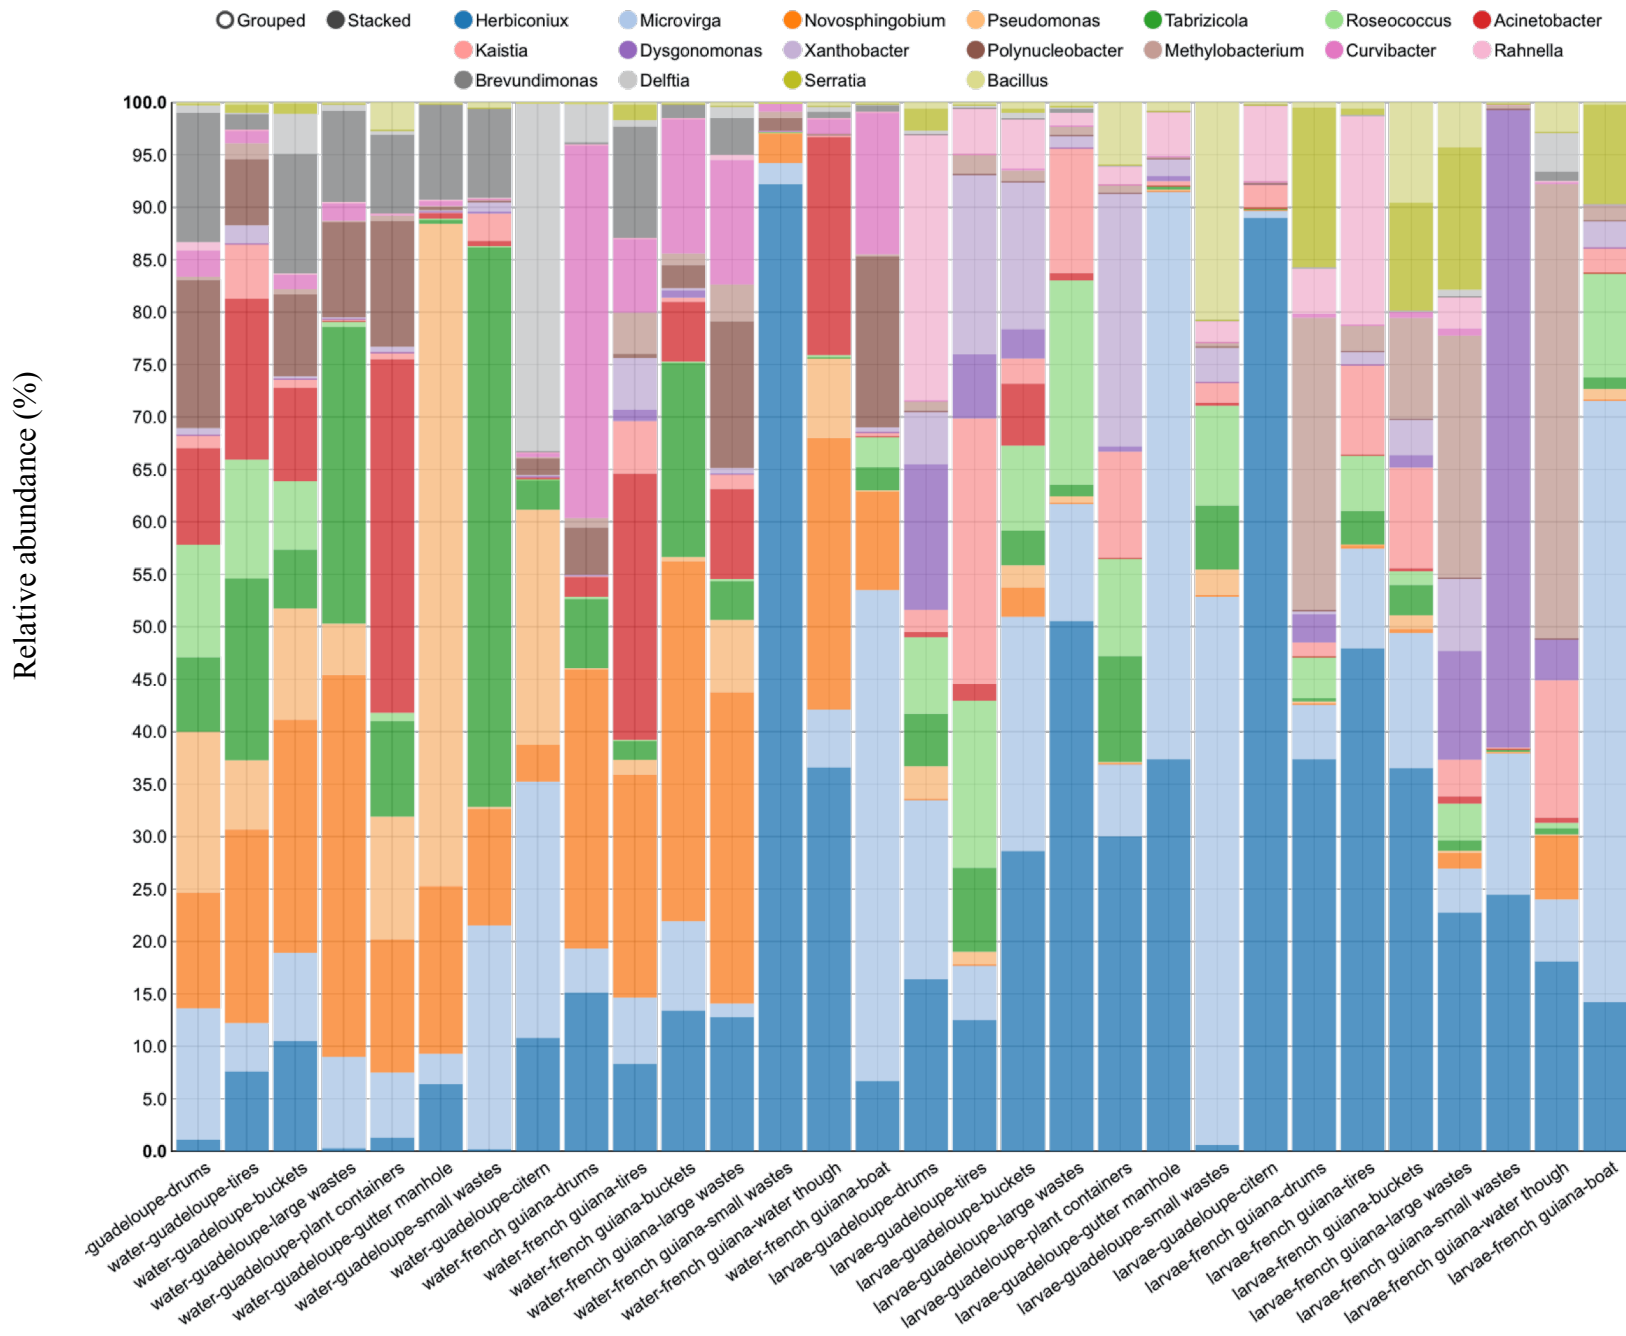

Supplement: 248_2020_1544_MOESM4_ESM.pdf [file 248_2020_1544_MOESM4_ESM.pdf]
