# Supplementary material for: Natural Variation in Physicochemical Profiles and Bacterial Communities Associated with Aedes aegypti Breeding Sites and Larvae on Guadeloupe and French Guiana
Source: Microb Ecol. 2020 Jul 3;81(1):93–109. doi: 10.1007/s00248-020-01544-3 (PMC7794107; doi:10.1007/s00248-020-01544-3)
Supplement: Supplementary file 5 — Spatial structuration and variability of microbiota associated with water at breeding sites and A. aegypti larvae. Non-metric multidimensional scaling plots based on UniFrac distances for water (A,B) and larvae (C,D) according to type of breeding site. (PDF 241 kb) (PDF 240 kb) [file 248_2020_1544_MOESM5_ESM.pdf]

A

Weighted UniFrac

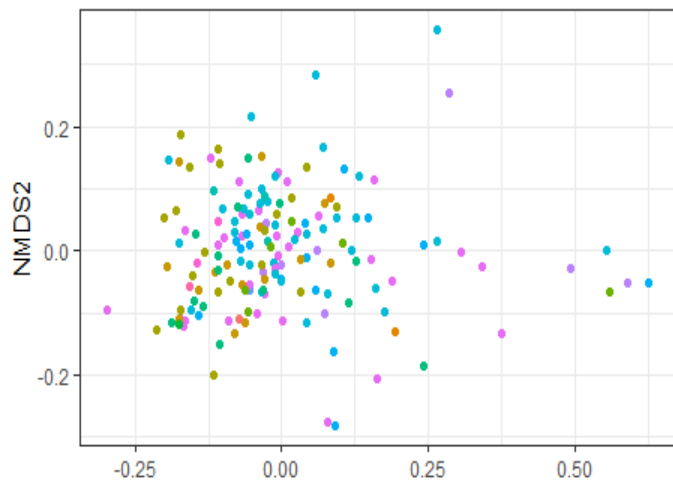

B

Unweighted UniFrac

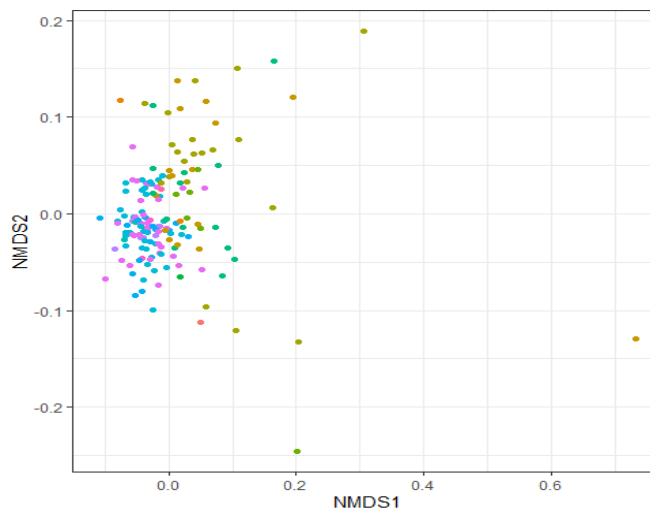

C

Weighted UniFrac

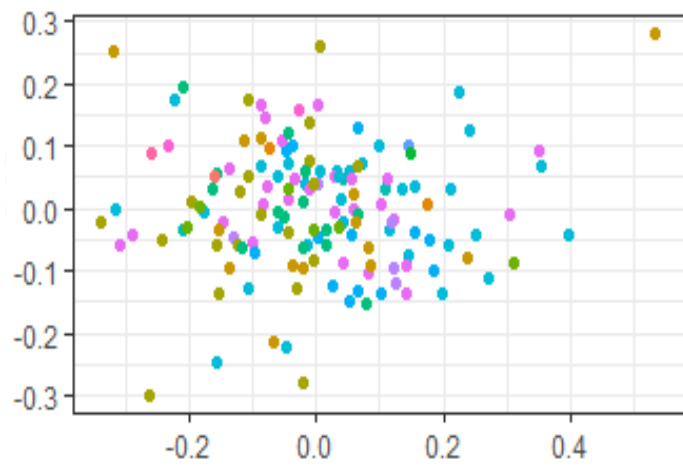

D

Unweighted UniFrac

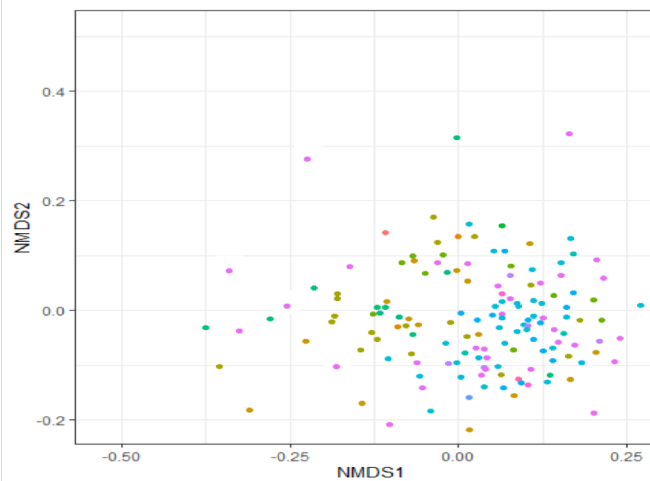

French Guiana

Guadeloupe

Large waste

Large waste

Drums

Drums

Tyres

Tyres

Small waste

Small waste

Buckets

Plant containers

Water trough

Gutters

Cistern
